# Supplementary material for: Arabidopsis SDG8 Potentiates the Sustainable Transcriptional Induction of the Pathogenesis-Related Genes PR1 and PR2 During Plant Defense Response
Source: Front Plant Sci. 2020 Mar 11;11:277. doi: 10.3389/fpls.2020.00277 (PMC7078350; doi:10.3389/fpls.2020.00277)
Supplement: TABLE S2 — List of genes bound by SDG8 among 121 genes known to function in the host response to pathogen challenge in Arabidopsis. [file Table_2.XLSX]

## Sheet: Feuil1
Table S2: List of genes bounded by SDG8* among 121 genes known to function in the host response to pathogen challenge in Arabidopsis.
Genes tudied in the present work and among that list are indicated in bold.
Gene ID	Gene name	Function(s) related to stress	Reference
AT1G64280	NON-EXPRESSER OF PR GENES 1 (NPR1)	serve as transcriptional co-activator for SA-responsive genes	Fan, W., Dong, X. (2002) In vivo interaction between NPR1 and transcription factor TGA2 leads to salicylic acid-mediated gene activation in Arabidopsis. Plant Cell 14: 1377-1389.
AT5G45110	NPR3	serve as transcriptional co-repressor for SA-responsive genes	Ding, Y., et al. (2018) Opposite Roles of Salicylic Acid Receptors NPR1 and NPR3/NPR4 in Transcriptional Regulation of Plant Immunity. Cell 173: 1454-1467.
AT4G19660	NPR4	as NPR3	as NPR3
AT3G53260	PHENYALANINE AMMONIA-LYASE 2 (PAL2)	phenylpropanoid biosynthesis, SA biosynthesis	Wanner, L.A., et al. (1995) The phenylalanine ammonia-lyase gene family in Arabidopsis thaliana. Plant Mol Biol 27: 327-338.
AT5G04230	PAL3	as PAL2	Huang, J., et al. (2010) Functional analysis of the Arabidopsis PAL gene family in plant growth, development, and response to environmental stress. Plant Physiol 153: 1526-1538.
AT2G31880	SUPPRESSOR OF BIR1 (SOBIR1)	leucine rich repeat transmembrane protein that is expressed in response to Pseudomonas syringae. positive regulation of defense response	Gao M., et al. (2009) Regulation of cell death and innate immunity by two receptor-like kinases in Arabidopsis. Cell Host Microbe 6: 34-44.
AT1G59870	PENETRATION3 (PEN3)	plasma membrane ABC transporter, contributes to nonhost resistance to inappropriate pathogens that enter by direct penetration in a salicylic acid–dependent manner. Required for MLO resistance.	Stein, M., et al. (2006) Arabidopsis PEN3/PDR8, an ATP binding cassette transporter, contributes to nonhost resistance to inappropriate pathogens that enter by direct penetration. Plant Cell 18: 731-746.
AT1G01720	ATAF1	putative transcriptional activator with NAC domain. Transcript level increases in response to wounding and abscisic acid.	Collinge M., Boller, T. (2001) Differential induction of two potato genes, Stprx2 and StNAC, in response to infection by Phytophthora infestans and to wounding. Plant Mol.Biol 46: 521-529.
AT5G61210	SOLUBLE N-ETHYLMALEIMIDE- SENSITIVE FACTOR ADAPTOR PROTEIN 33 (SNAP33)	Forms part of plasma membrane SNARE PEN1-SNAP33-VAMP721/722 secretory complex that functions in plant defence	Kwon, C., et al. (2008) Co-option of a default secretory pathway for plant immune responses. Nature 451: 835-840.
AT5G45250	RESISTANT TO P. SYRINGAE 4 (RPS4)	Toll/interleukin-1 receptor (TIR)-nucleotide binding site (NBS)-LRR class of disease resistance (R) genes. Confers specific resistance to Pseudomonas syringae pv. tomato carrying the avirulence gene AvrRPS4	Wirthmueller, L., et al. (2007) Nuclear accumulation of the Arabidopsis immune receptor RPS4 is necessary for triggering EDS1-dependent defence. Curr Biol 17: 2023-2029.
AT5G13160	avrPphB susceptible 1 (PBS1)	Mutant is defective in perception of Pseudomonas syringae avirulence gene avrPphB. Encodes a putative serine-threonine kinase.	Warren, R.F., et al. (1999) Identification of three putative signal transduction genes involved in R gene-specified disease resistance in Arabidopsis. Genetics 152: 401-412.
AT5G47910	RESPIRATORY BURST OXIDASE HOMOLOGUE D (RBOHD)	Interacts with AtrbohF gene to fine tune the spatial control of ROI production and hypersensitive response to cell in and around infection site.	Pogany, M et al. (2009) Dual roles of reactive oxygen species and NADPH oxidase rbohD in an Arabidopsis-Alternaria pathosystem Plant Physiol 151: 1459-1475.
AT2G39940	CORONATINE INSENSITIVE 1 (COI1)	Required for wound- and jasmonates-induced transcriptional regulation, defense response to fungus	Xie, D., et al. (1998) COI1: an Arabidopsis gene required for jasmonate-regulated defense and fertility. Science 280: 1091-1094.
AT5G42650	ALLENE OXIDE SYNTHASE (AOS)	JA biosynthetic pathway, defense response	Laudert, D., et al. (1996) Cloning, molecular and functional characterization of Arabidopsis thaliana allene oxide synthase (CYP74), the first enzyme of the octadecanoid pathway to jasmonates. Plant Mol Biol 31: 323-335.
AT2G33150	PEROXISOMAL 3-KETOACYL-COA THIOLASE 3 (PKT3), KAT 2	JA biosynthetic process	Pye, V.E., et al. (2010) Peroxisomal plant 3- ketoacyl-CoA thiolase structure and activity are regulated by a sensitive redox switch. J Biol Chem. 285: 24078-24088.
AT4G11260	SGT1B	required for defense signaling conferred by several downy mildew resistance genes, JA mediated signaling pathway.	Tor, M., et al. (2002) Arabidopsis SGT1b is required for defense signaling conferred by several downy mildew resistance genes. Plant Cell 14: 993-1003.
AT3G45640	MITOGEN-ACTIVATED PROTEIN KINASE 3 (MPK3)	Functions in MAP kinase cascade involving MEKK1, MKK4/MKK5 and MPK3/MPK6 that functions downstream of the FLS2 fagellin receptor, activation of this MAPK cascade confers resistance to both bacterial and fungal pathogens	Asai, T., et al. (2002) MAP kinase signalling cascade in Arabidopsis innate immunity. Nature 415: 977-983.
AT4G29810	MITOGEN-ACTIVATED PROTEIN KINASE KINASE 2 (MKK2)	Shares functional redundancy with MKK1/2, involved in jasmonate- and salicylate-dependent defense responses	Qiu, J.L., et al. (2008) Arabidopsis mitogen-activated protein kinase kinases MKK1 and MKK2 have overlapping functions in defense signaling mediated by MEKK1, MPK4, and MKS1. Plant Physiol 148: 212-222.
AT1G51660	MKK4	Functions in MAP kinase cascade involving MEKK1, MKK4/MKK5 and MPK3/MPK6 that functions downstream of the FLS2 fagellin receptor, activation of this MAPK cascade confers resistance to both bacterial and fungal pathogens	Asai, T., et al. (2002) MAP kinase signalling cascade in Arabidopsis innate immunity. Nature 415: 977-983.
AT1G73500	MKK9	Autophosphorylates and also phosphorylates MPK3 and MPK6. Independently involved in ETH and calmalexin biosynthesis. Induces transcription of ACS2, ACS6, ERF1, ERF2, ERF5, ERF6, CYP79B2, CYP79B3, CYP71A13 and PAD3.	Xu, J., et al. (2008) Activation of MAPK kinase 9 induces ethylene and camalexin biosynthesis and enhances sensitivity to salt stress in Arabidopsis. J Biol Chem 283: 26996-27006.
AT1G10210	MITOGEN-ACTIVATED PROTEIN KINASE 1 (ATMPK1)	Activated by wounding JA	Ortiz-Masia, D., et al. (2007) Diverse stress signals activate the C1 subgroup MAP kinases of Arabidopsis. FEBS Lett 581: 1834-1840.
AT1G32640	MYC2	MYC-related transcriptional activator, regulates diverse JA-dependent functions.	Lorenzo, O., et al. (2004) JASMONATE-INSENSITIVE1 encodes a MYC transcription factor essential to discriminate between different jasmonate- regulated defense responses in Arabidopsis. Plant Cell 16: 1938-1950.
AT3G15210	ETH RESPONSIVE ELEMENT BINDING FACTOR 4 (ERF4)	member of the ERF subfamily of transcription factors, negative regulator of JA-responsive defense gene expression and resistance to the necrotrophic fungal pathogen Fusarium oxysporum and antagonizes JA inhibition of root elongation	McGrath, K.C., et al. (2005) Repressor- and activator-type ethylene response factors functioning in jasmonate signaling and disease resistance identified via a genome-wide screen of Arabidopsis transcription factor gene expression. Plant Physiol 139: 949-959.
AT2G38470	WRKY33	Regulates the antagonistic relationship between defense pathways mediating responses to P. syringae and necrotrophic fungal pathogens	Zheng, Z., et al. (2006) Arabidopsis WRKY33 transcription factor is required for resistance to necrotrophic fungal pathogens. Plant J 48: 592-605.
AT1G80840	WRKY40	Pathogen-induced transcription factor, forms protein complexes with itself and with WRKY40 and WRKY60. WRKY18, -40, and -60 have partially redundant roles in response to the hemibiotrophic bacterial pathogen P. syringae and the necrotrophic fungal pathogen B cinerea, with WRKY18 playing a more important role than the other two.	Chen C.H., Chen, Z.X. (2002) Potentiation of developmentally regulated plant defense response by AtWRKY18, a pathogen-induced Arabidopsis transcription factor. Plant Physiol 129: 706-
AT3G56400	WRKY70	Function as activator of SA-dependent defense genes and a repressor of JA-regulated genes. WRKY70-controlled suppression of JA-signaling is partly executed by NPR1	Li, J., et al. (2006) WRKY70 modulates the selection of signaling pathways in plant defense. Plant J 46: 477-491.
* based on the expanded list of SDG8 genome-wide targets presented in Li, Y., et al 2015 (Raw data were deposited in NCBI SRA SRX749018).
